# Supplementary material for: A highly selective turn-off fluorescent probe for Cu(ii) based on a dansyl derivative and its application in living cell imaging
Source: Royal Society of Chemistry journal article supplement (doi:10.1039/c4ra02050b), 2014-01-01
Supplement: c4ra02050b1.pdf [file c4ra02050b1.pdf]

## Supplementary data

### A highly selective turn-off fluorescent probe for Cu(II) based on dansyl derivative and its application in living cell imaging

Jianguo Huang<sup>a</sup>, Min Liu<sup>a</sup>, Xiaoqian Ma<sup>b</sup>, Qiong Dong<sup>b</sup>, Bin Ye<sup>b</sup>, Wei Wang<sup>b</sup>, Wenbin Zeng<sup>a,\*</sup>

<sup>a</sup>School of Pharmaceutical Sciences, Central South University.

<sup>b</sup>The Third Xiangya Hospital, Central South University

Correspondence information: Wenbin Zeng, School of Pharmaceutical Sciences, Central South University, 172 Tongzipo road, Changsha, 410013, P. R. China. Fax: 0086-731-82650459;

Tel: 0086-731-82650459; E-mail: wbzeng@hotmail.com.

#### Contents

|                                                                                       |                 |
|---------------------------------------------------------------------------------------|-----------------|
| 1. Optimization of condition for probe <b>1</b> measurement.....                      | <b>S1</b>       |
| 2. The UV response of <b>1</b> to various metal ions.....                             | <b>S2</b>       |
| 3. The titration experiments of probe <b>1</b> .....                                  | <b>S3</b>       |
| 4. The fluorescent intensity change of <b>1</b> to various anions.....                | <b>S4</b>       |
| 5. Binding Constant.....                                                              | <b>S5</b>       |
| 6. Job plot of the complexation between the probe <b>1</b> and Cu <sup>2+</sup> ..... | <b>S6</b>       |
| 7. The effect of pH.....                                                              | <b>S7-S8</b>    |
| 8. Fluorescence quantum yields.....                                                   | <b>Table S1</b> |
| 9. Reference                                                                          |                 |
| 10. <sup>1</sup> H NMR, <sup>13</sup> C NMR and ESI or HRMS spectra                   |                 |

## 1. Optimization of condition for probe 1 measurement

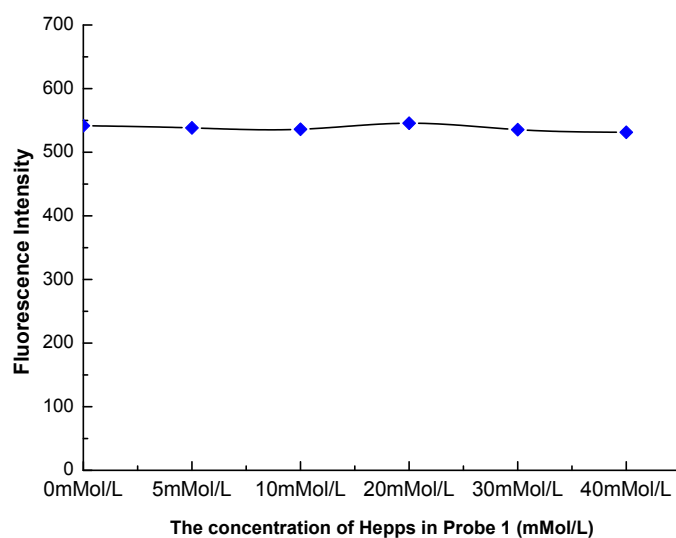

**Fig. S1.** Influence of the HEPES buffer solution concentration on the fluorescence intensity of 20  $\mu\text{M}$  probe 1. (pH =7.0,  $\lambda_{\text{ex}}/\lambda_{\text{em}} = 348 \text{ nm}/515 \text{ nm}$ ).

## 2. The UV response of 1 to various metal ions

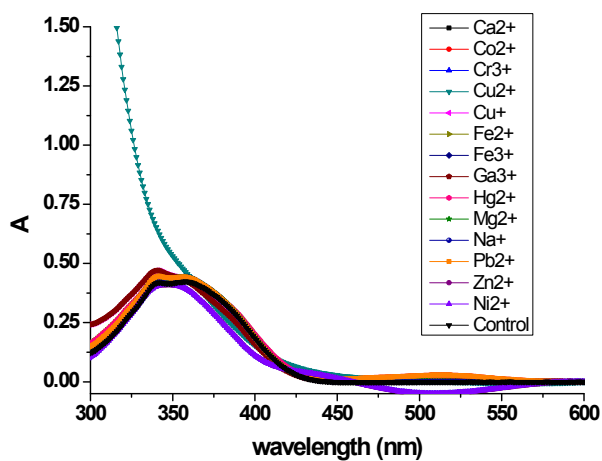

**Fig. S2.** UV-vis absorption spectra of probe 1 (16  $\mu\text{M}$ ) towards various metal ions (800 $\mu\text{M}$ ) in  $\text{CH}_3\text{CN}/\text{HEPES}$  buffer (8/2, v/v, pH =7.0).

### 3. The titration experiments of probe 1

(a)

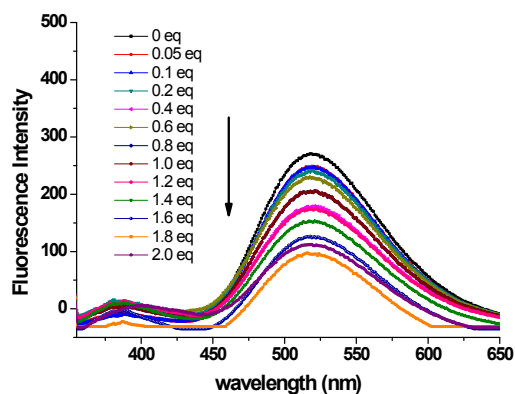

(b)

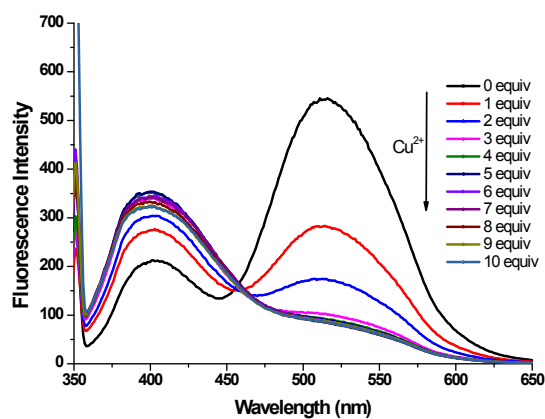

(c)

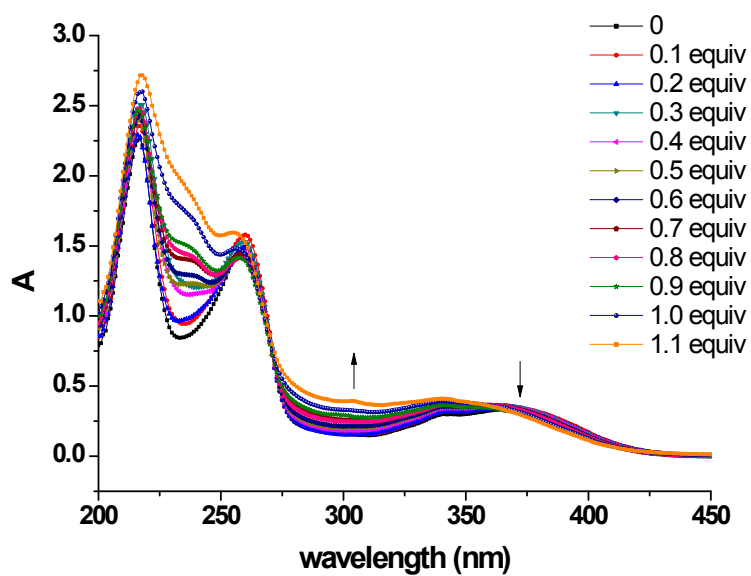

(d)

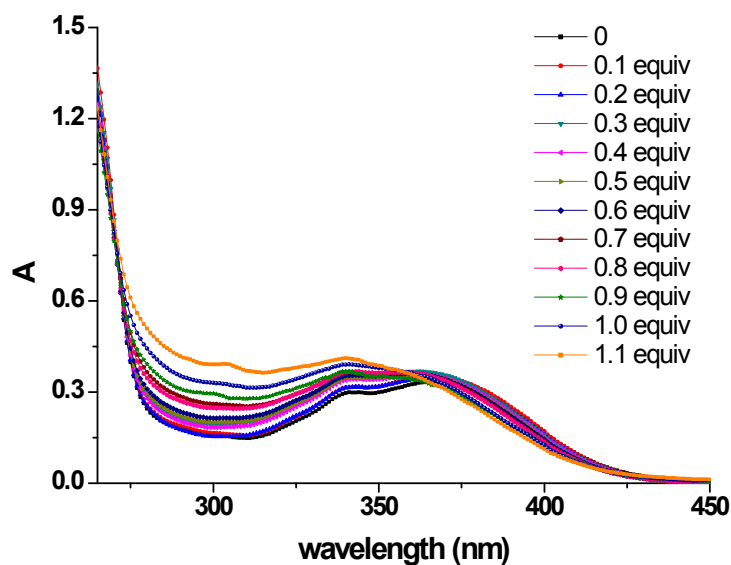

**Fig. S3.** (a) Fluorescence spectra of 8  $\mu\text{M}$  probe 1 with  $\text{Cu}^{2+}$  between 0 and 2 equiv ( $\text{CH}_3\text{CN}/\text{HEPES}$  buffer = 8/2, v/v, pH=7.0,  $\lambda_{\text{ex}}/\lambda_{\text{em}}$ = 348 nm /515 nm); (b) Fluorescence spectra of 20  $\mu\text{M}$  probe 1 with  $\text{Cu}^{2+}$  between 0 and 10 equiv (only HEPES buffer, pH=7.0,  $\lambda_{\text{ex}} = 348$  nm); (c) UV-vis absorption spectra of probe 1 (16  $\mu\text{M}$ ) with  $\text{Cu}^{2+}$  between 0 and 1.1 equiv ( $\text{CH}_3\text{CN}/\text{HEPES}$  buffer = 8/2, v/v, pH=7.0); (d) spectra of (c) from 260 nm to 450 nm.

#### 4. The fluorescent intensity change of 1 to various anions

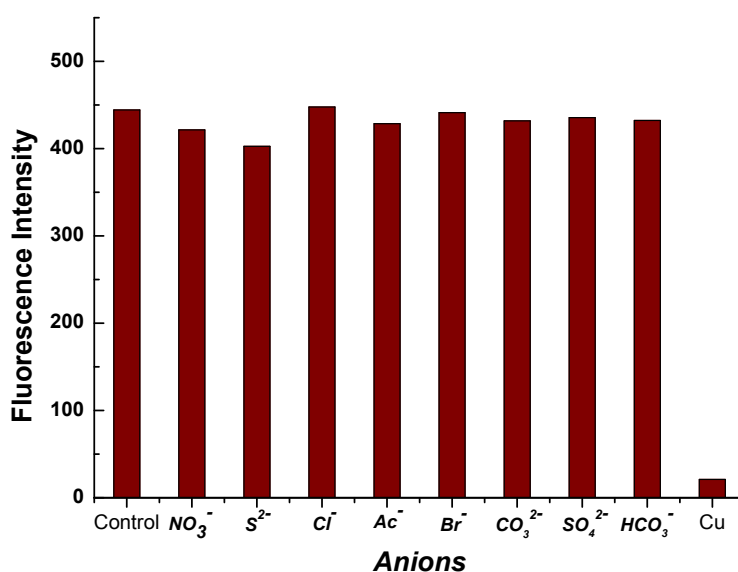

**Fig. S4.** The fluorescence variation of probe 1 (16  $\mu\text{M}$ ) to various anions at 800  $\mu\text{M}$  concentration in  $\text{CH}_3\text{CN}/\text{HEPES}$  buffer (8/2, v/v, pH=7.0,  $\lambda_{\text{ex}}/\lambda_{\text{em}}$ = 348 nm /515 nm).

## 5. Binding Constant<sup>1</sup>

The binding constant was calculated from the emission intensity - titration curves.

According to the equation:

$$(F-F_0)/F_0 = f/[1+(1/K_s [Cu^{2+}])],$$

where  $F_0$  is the emission intensity of probe **1** at 515 nm,  $F$  is the emission intensity of **1** at 515 nm upon the addition of different concentration of Cu (II),  $f$  is the fraction of the initial fluorescence which is accessible to the sensor,  $[Cu^{2+}]$  is the concentration of  $Cu^{2+}$ .

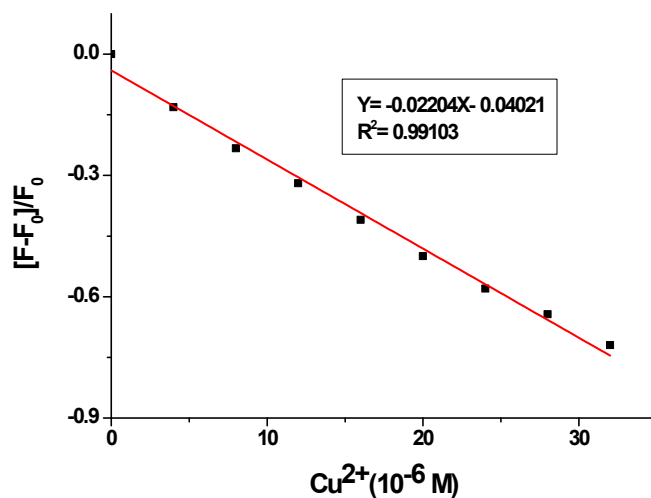

**Fig. S5.** Fitting of Fluorescence titration curve of **1** in  $CH_3CN/HEPES$  (8: 2, v/v, pH =7.0). The binding constant is  $K_s = 5.08 \times 10^4 M^{-1}$ .

## 6. Job plot of the complexation between the probe **1** and $Cu^{2+}$

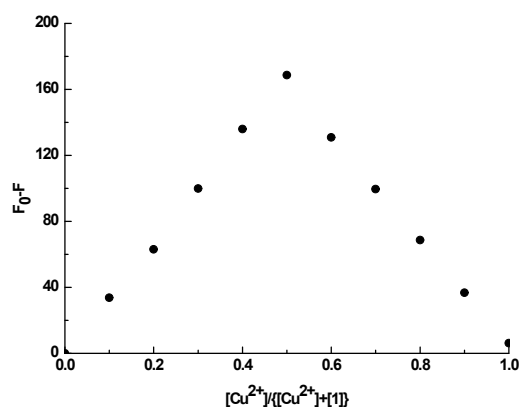

**Fig. S6.** Job plot of the complexation between the probe **1** and  $Cu^{2+}$  ( $CH_3CN/HEPES$  buffer = 8/2, v/v, pH=7.0,  $\lambda_{ex}/\lambda_{em} = 348 \text{ nm} / 515 \text{ nm}$ ). The total molar concentration of **1** and  $Cu^{2+}$  is  $10 \mu M$ ;

## 7. The effect of pH

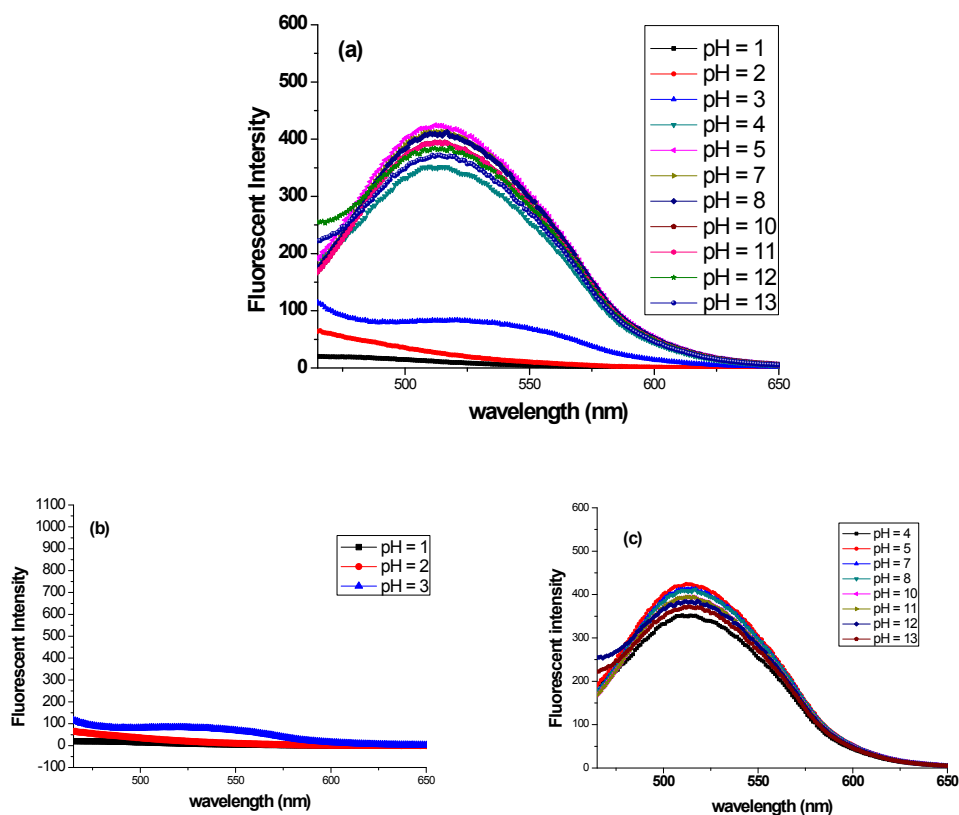

**Fig. S7.** (a) Influence of pH on fluorescence spectra of free **1** (16  $\mu$ M) in  $\text{CH}_3\text{CN}/\text{H}_2\text{O}$  solution (8/2, v/v); (b) Influence of pH from 1.0 to 3.0; (c) Influence of pH 4.0 to 13.0.

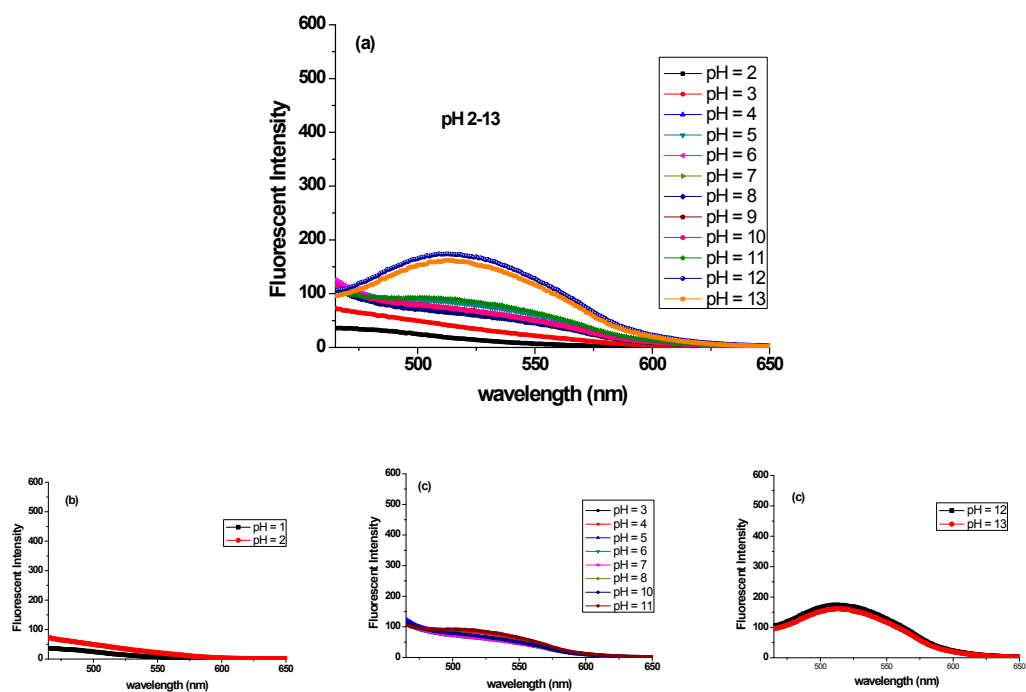

**Fig. S8.** (a) Influence of pH on fluorescence spectra of **1**/Cu<sup>2+</sup> adduct (16 μM **1** and 80 μM Cu<sup>2+</sup>) in CH<sub>3</sub>CN/H<sub>2</sub>O solution (8/2, v/v); (b) Influence of pH from 1.0 to 2.0; (c) Influence of pH from 3.0 to 11.0; (d) Influence of pH from 12.0 to 13.0.

## 8. Fluorescence quantum yield

**Table S1.** Photophysical Data<sup>a</sup>

| Sample                      | F <sub>515</sub> | Φ <sub>f</sub> (%) |
|-----------------------------|------------------|--------------------|
| <b>1</b>                    | 178.03           | 8.2                |
| <b>1</b> + Cu <sup>2+</sup> | 9.23             | 0.42               |

<sup>a</sup>F<sub>515</sub>: Fluorescence intensity at 515nm. Φ<sub>f</sub>: Fluorescence quantum yield.

## 9. Reference

- Hou, F.P.; Huang, L.; Xi, P.X.; Cheng, J.; Zhao, X. F.; Xie, G.Q.; Shi, Y.J.; Cheng, F.J.; Yao, X.J.; Bai, D.C.; Zeng, Z. Z. *Inorg. Chem.* 2012, **51**, 2454.
- Melhuish, W. H. *J. Phys. Chem.* 1961, **65**, 229.

10.  $^1\text{H}$  NMR,  $^{13}\text{C}$  NMR, ESI-MS or HRMS spectra

5-(1, 3-dioxoisindolin-2-yl)naphthalene-1-sulfonic acid (3)

$^1\text{H}$  NMR (400 MHz,  $\text{CDCl}_3$ )

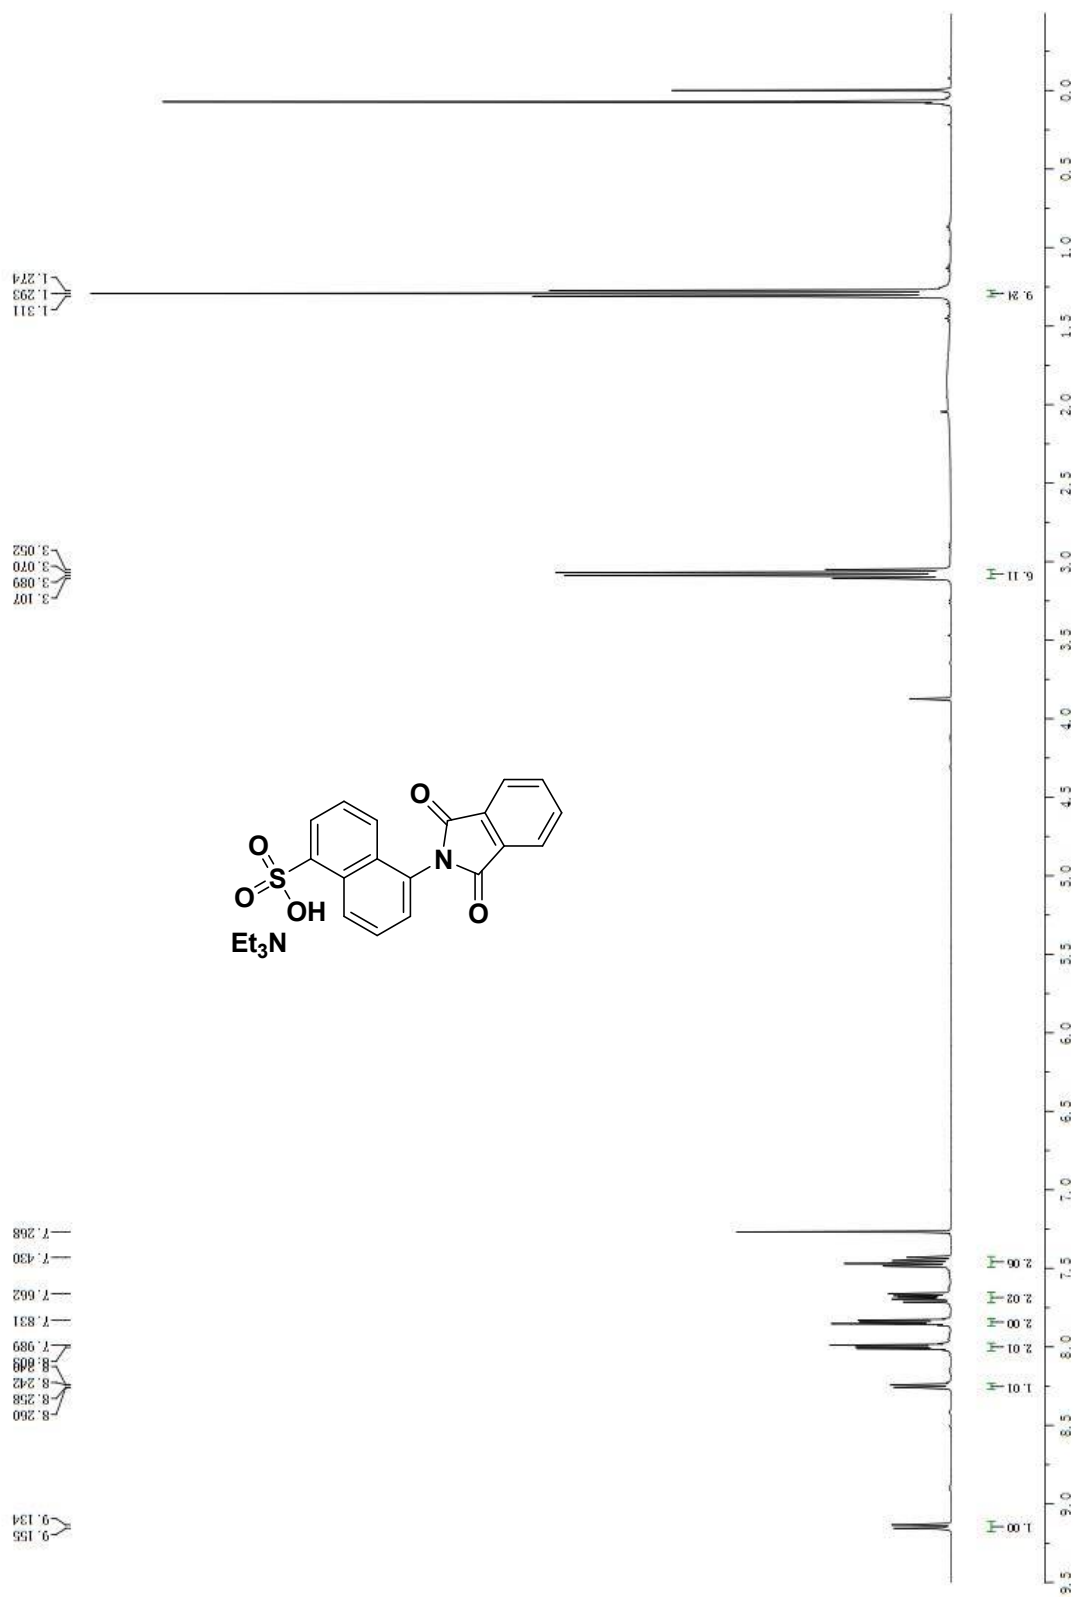



# 5-(1,3-dioxoisindolin-2-yl)naphthalene-1-sulfonic acid (3)

$^{13}\text{C}$  NMR (400 MHz,  $\text{CDCl}_3$ )

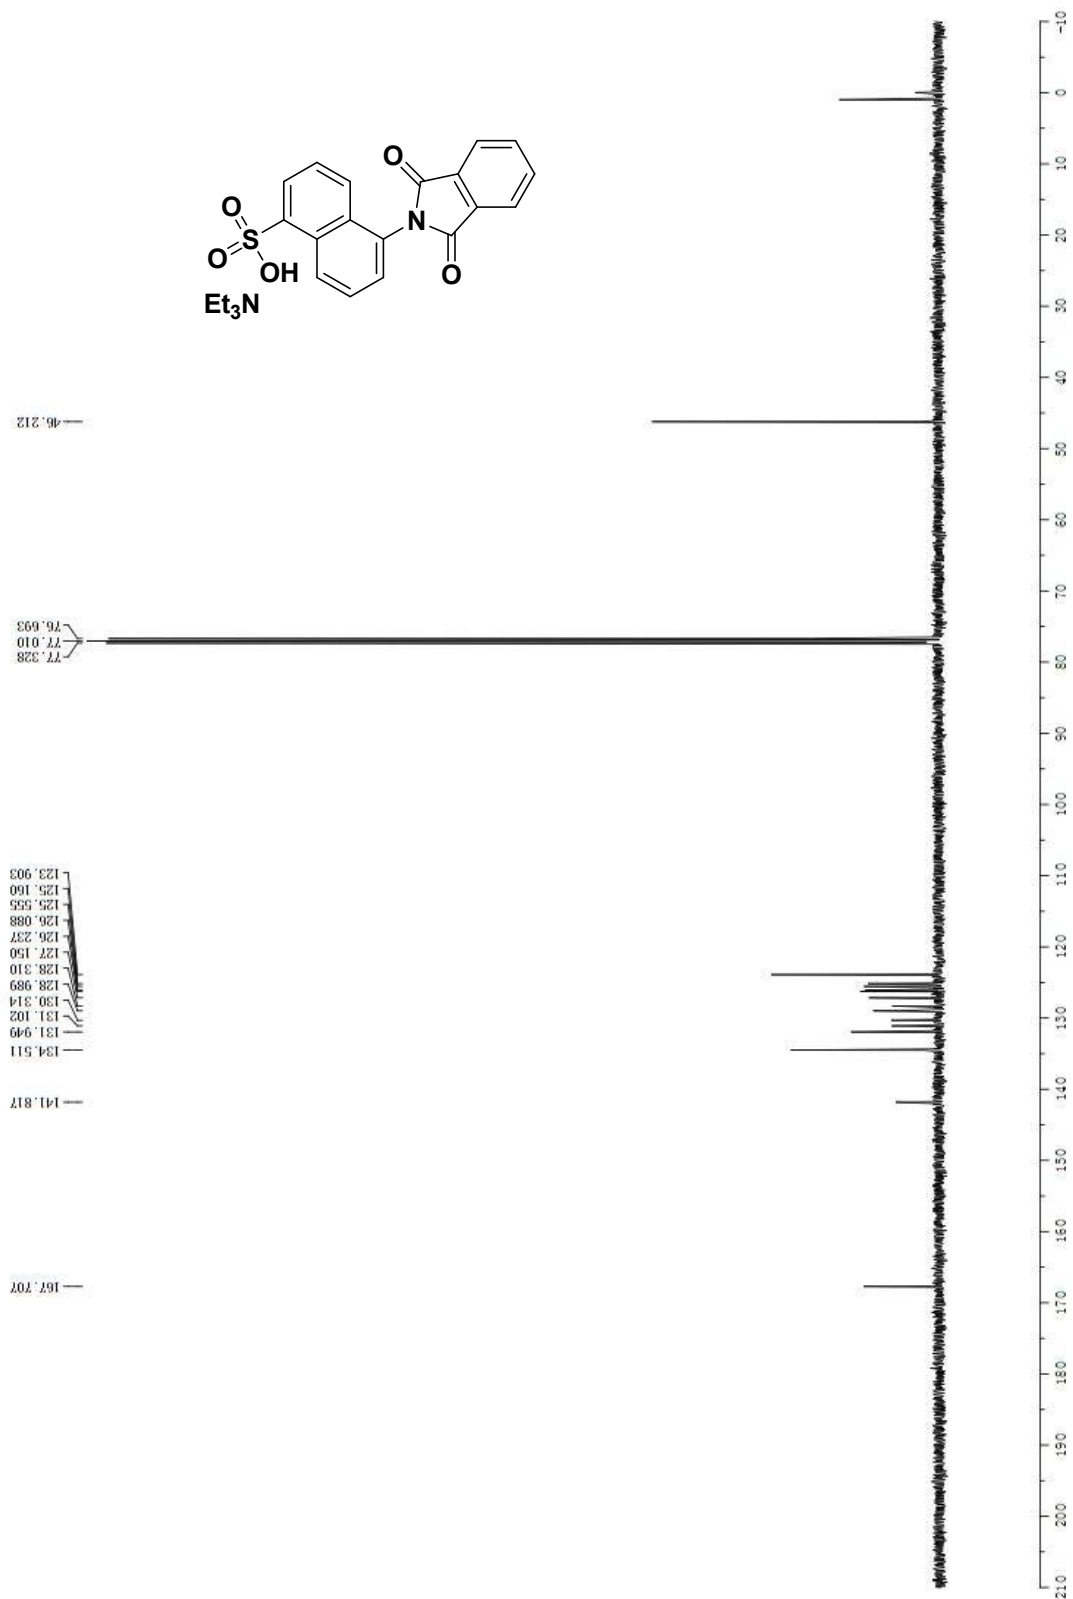

# 5-(1,3-dioxisoindolin-2-yl)naphthalene-1-sulfonic acid (3)

## HRMS

Page 1

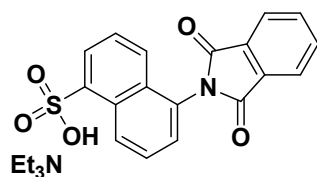

1: TOF MS ES+  
1.01e+000

### Elemental Composition Report

#### Single Mass Analysis

Tolerance = 100.0 PPM / DBE: min = -1.8, max = 50.0

Element prediction: Off

Number of isotope peaks used for i-FIT = 3

Monoisotopic Mass, Even Electron Ions

12 formula(e) evaluated with 1 results within limits (all results (up to 1000) for each mass)

Elements Used:

C: 24-24 H: 26-26 N: 0-3 O: 4-5 S: 0-2 Na: 0-1

454.1562

XFX-2.2 (0.054)

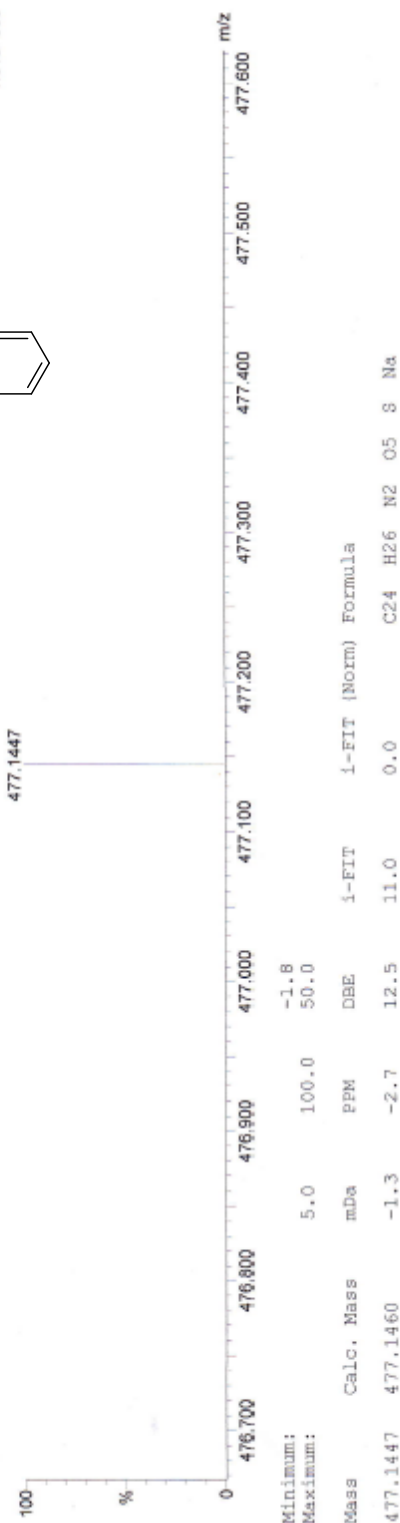

Minimum: -1.8

Maximum: 50.0

Mass Calc. Mass PPM DBE i-FIT i-FIT (Norm) Formula

477.1447 477.1460 -1.3 -2.7 12.5 11.0 0.0 C24 H26 N2 O5 S Na

**Tert-butyl 4-(5-(1,3-dioxoisindolin-2-yl)naphthalene-1-sulfonamido)piperidine-1-carboxylate (5)**

**<sup>1</sup>H NMR (400 MHz, CDCl<sub>3</sub>)**

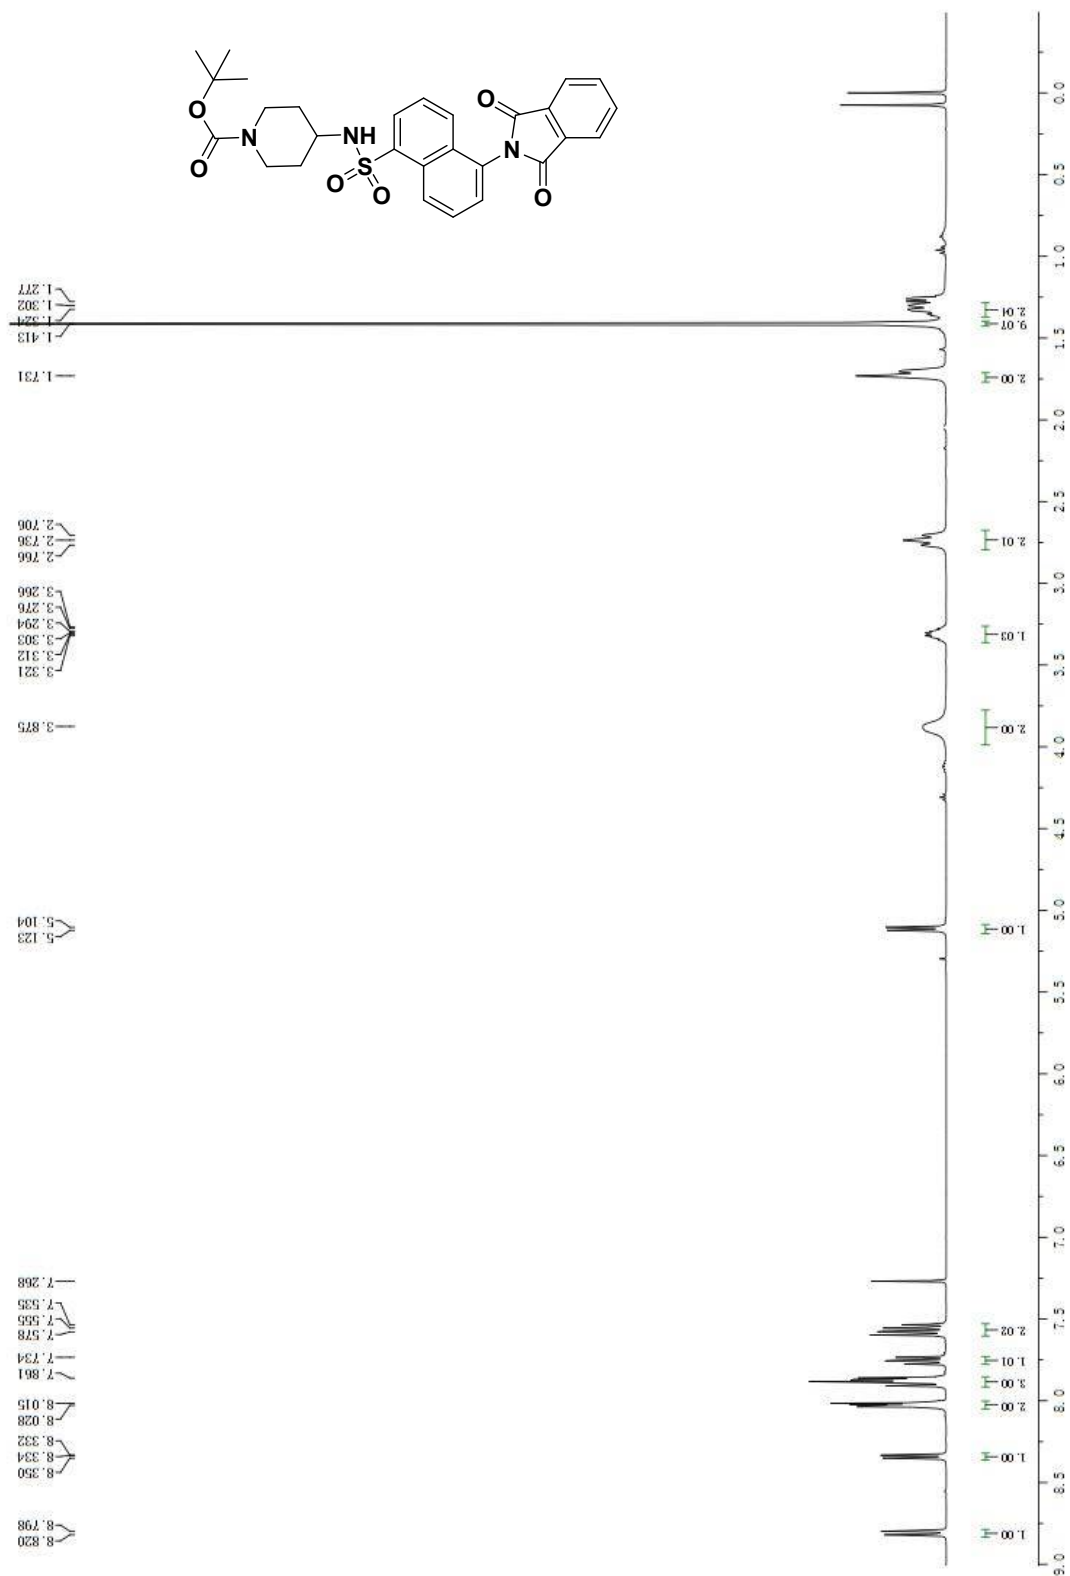

**Tert-butyl 4-(5-(1,3-dioxisoindolin-2-yl)naphthalene-1-sulfonamido) piperidine -1-carboxylate (5)**

**$^{13}\text{C}$  NMR (400 MHz,  $\text{CDCl}_3$ )**

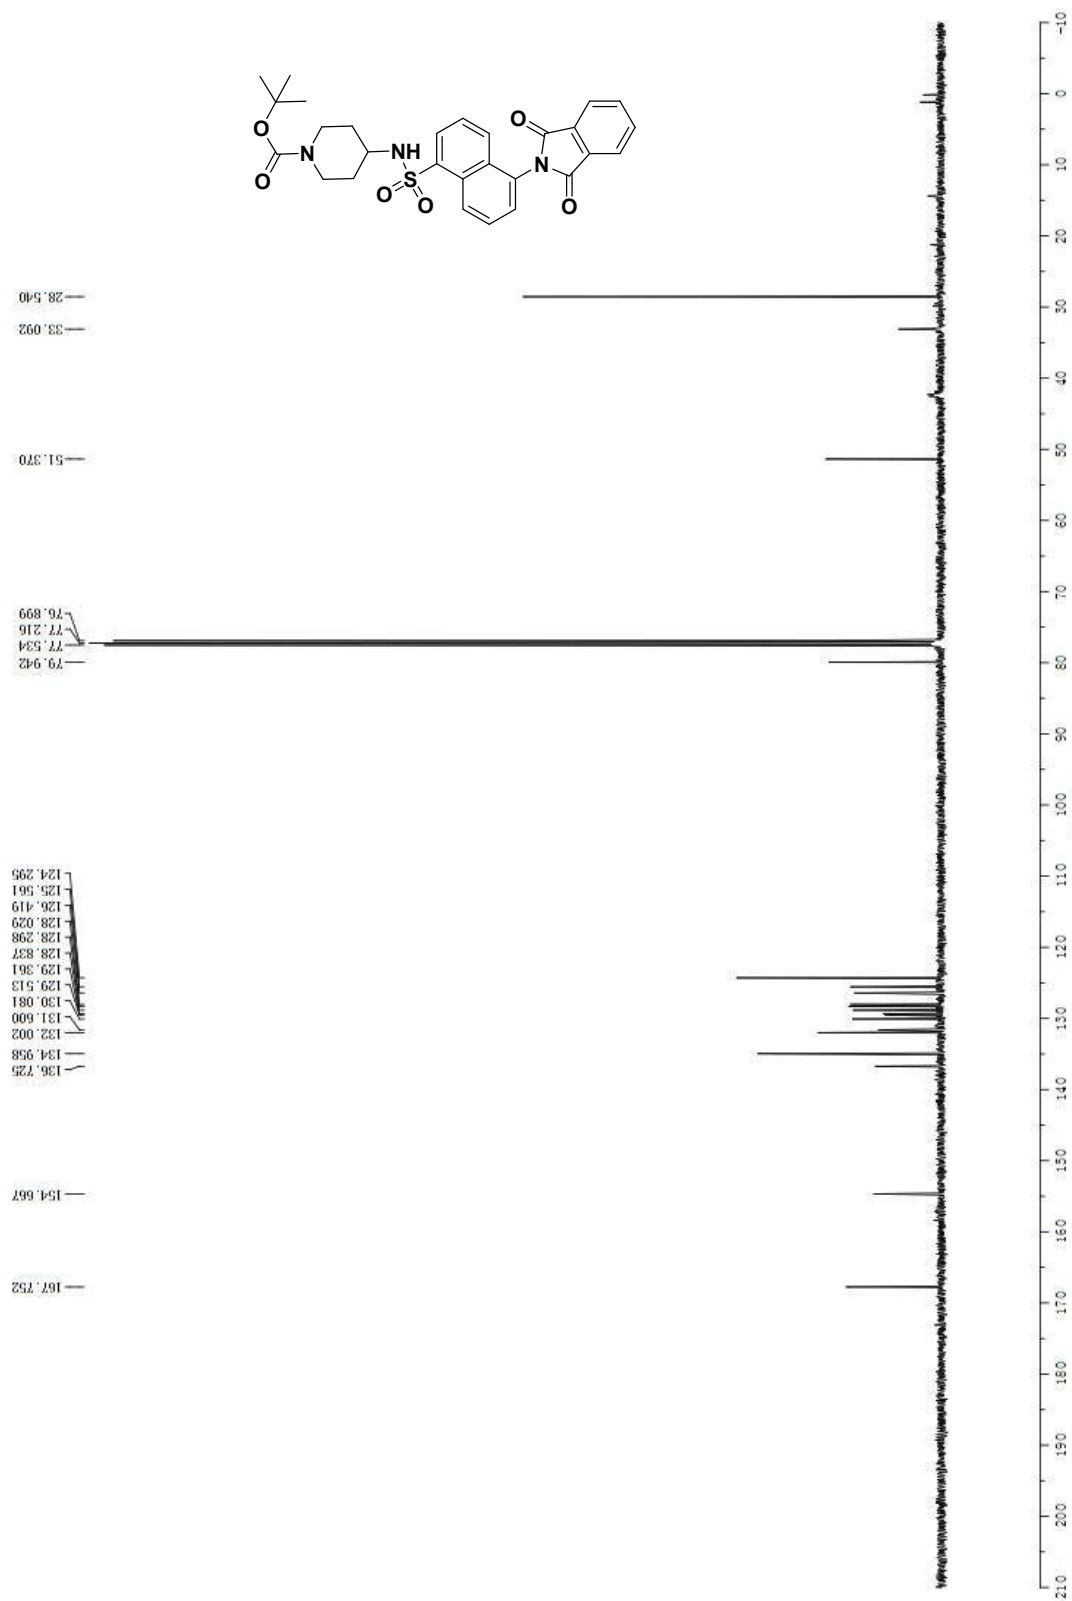

# Tert-butyl(4-(5-(1,3-dioxoisindolin-2-yl)naphthalene-1-sulfonamido) piperidine -1-carboxylate (5)

## HRMS

Page 1

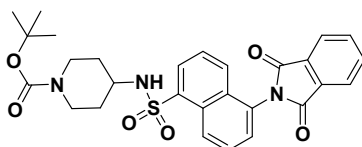

1: TOF MS ES+  
4.56e+001

### Elemental Composition Report

#### Single Mass Analysis

Tolerance = 10.0 PPM / DBE: min = -1.8, max = 50.0

Element prediction: Off

Number of isotope peaks used for i-FIT = 3

Monoisotopic Mass, Even Electron Ions

92 formulae) evaluated with 1 results within limits (all results (up to 1000) for each mass)

Elements Used:

C: 28-28 H: 29-329 N: 0-6 O: 0-6 S: 0-1

535.1777

FX-001 3 (0.083) Cm (2.34)

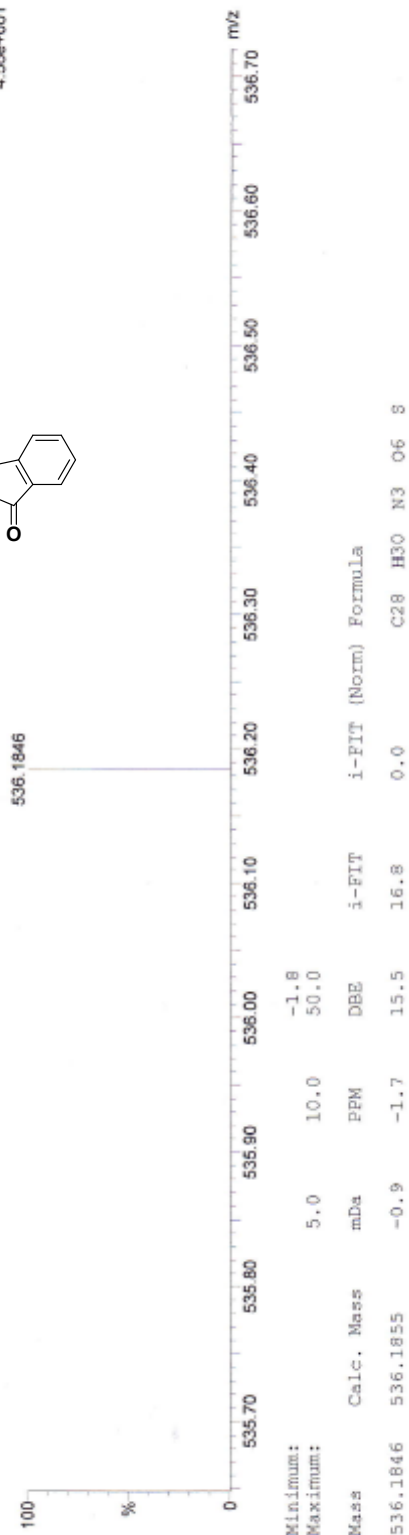

Minimum:

Maximum: 5.0 10.0 -1.8

Mass

536.1846

536.1855

-0.9

-1.7

15.5

16.8

0.0

C28 H30 N3 O6 S

# 5-(1,3-dioxisoindolin-2-yl)-N-(piperidin-4-yl)naphthalene-1-sulfonamide (6)

<sup>1</sup>H NMR (400 MHz, CDCl<sub>3</sub>)

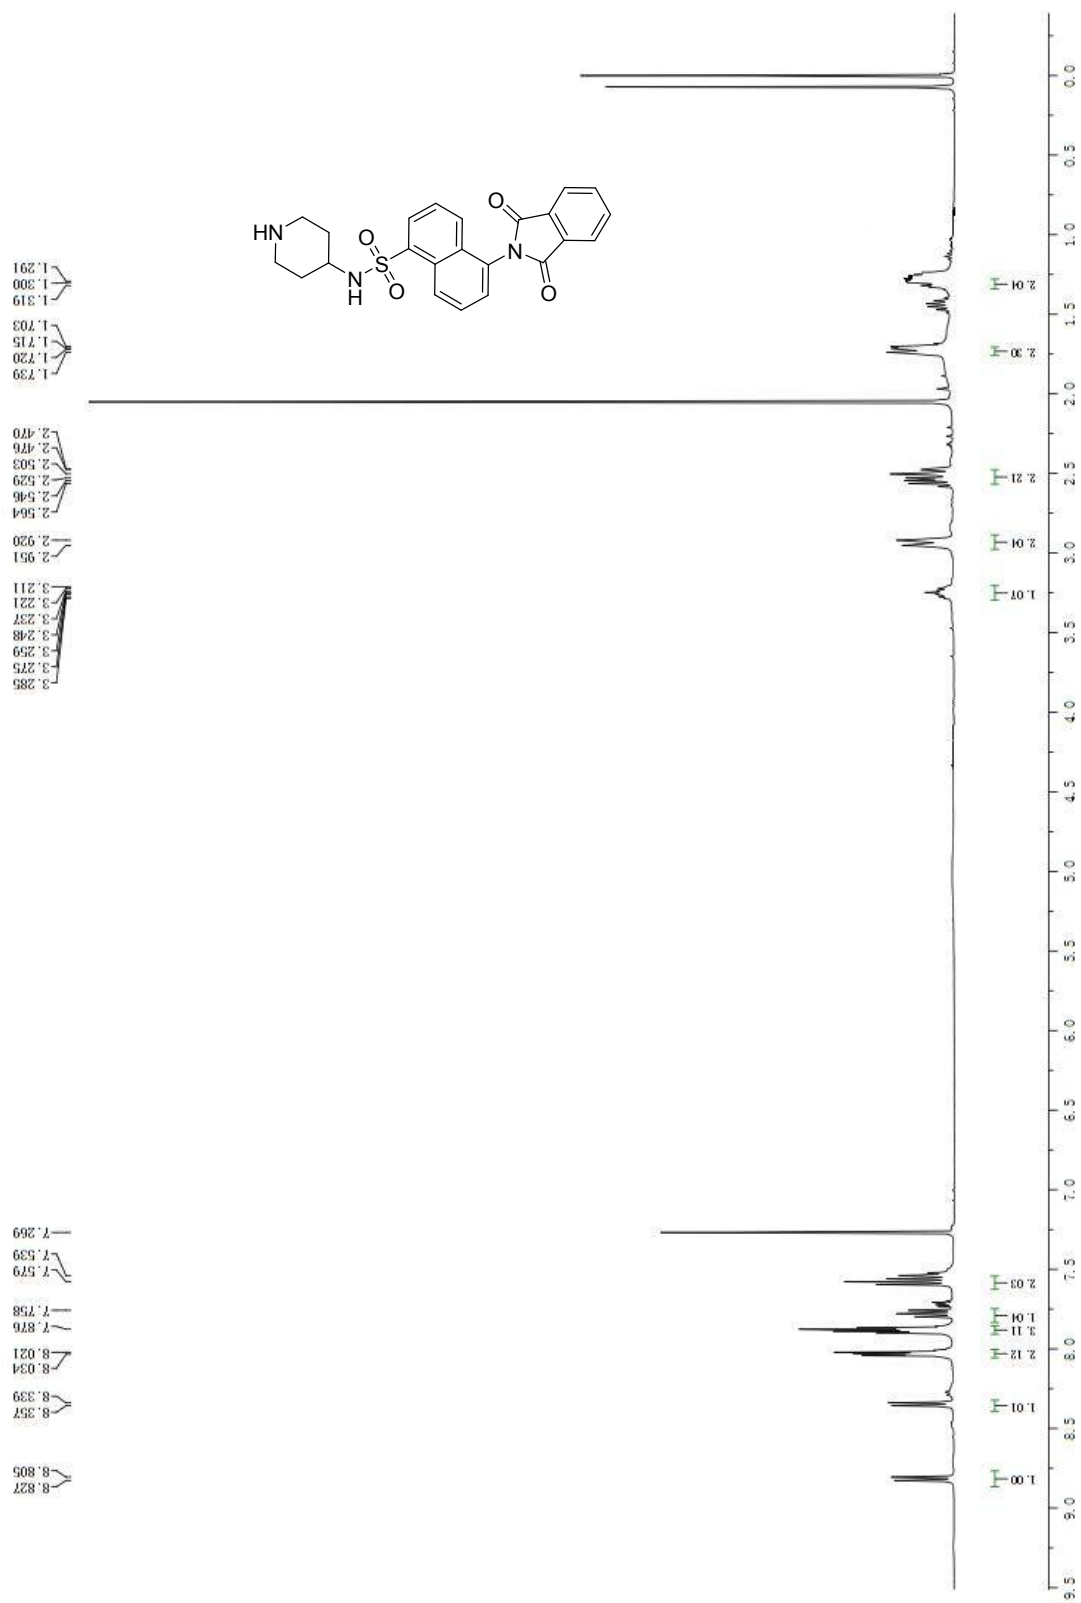

# 5-(1,3-dioxisoindolin-2-yl)-N-(piperidin-4-yl)naphthalene-1-sulfonamide (6)

ESI-MS

## Mass Spectrum Deconvolution Report

|                      |                            |                                              |             |
|----------------------|----------------------------|----------------------------------------------|-------------|
| <b>Analysis Info</b> |                            | <b>Acquisition Date</b> 3/29/2012 6:38:57 PM |             |
| <b>Analysis Name</b> | D:\Data\20120329-Jack-09.d | <b>Operator</b>                              | YLJ         |
| <b>Method</b>        | 20111121-TEA.m             | <b>Instrument</b>                            | esquire6000 |
| <b>Sample Name</b>   | 20120329-Jack-09           |                                              |             |
| <b>Comment</b>       | 20120329-Jack-09           |                                              |             |

|                              |              |                     |           |                                 |          |
|------------------------------|--------------|---------------------|-----------|---------------------------------|----------|
| <b>Acquisition Parameter</b> |              |                     |           |                                 |          |
| <b>Ion Source Type</b>       | ESI          | <b>Ion Polarity</b> | Positive  | <b>Alternating Ion Polarity</b> | off      |
| <b>Mass Range Mode</b>       | Std/Normal   | <b>Scan Begin</b>   | 105 m/z   | <b>Scan End</b>                 | 1000 m/z |
| <b>Capillary Exit</b>        | 113.5 Volt   | <b>Skimmer</b>      | 40.0 Volt | <b>Trap Drive</b>               | 29.9     |
| <b>Accumulation Time</b>     | 1162 $\mu$ s | <b>Averages</b>     | 2 Spectra | <b>Auto MS/MS</b>               | off      |

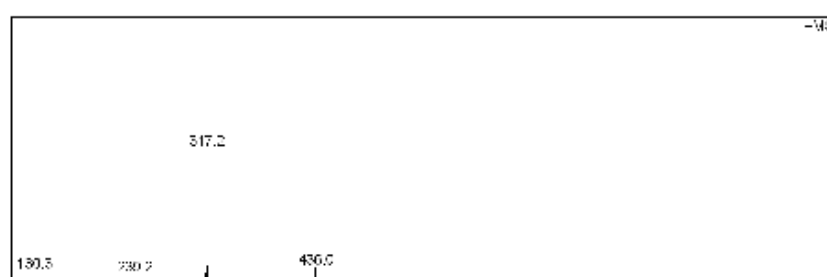

| #  | m/z   | I      |
|----|-------|--------|
| 1  | 116.3 | 11708  |
| 2  | 130.3 | 19035  |
| 3  | 239.2 | 13555  |
| 4  | 241.2 | 3001   |
| 5  | 288.4 | 4146   |
| 6  | 317.2 | 240331 |
| 7  | 318.0 | 32527  |
| 8  | 319.2 | 3411   |
| 9  | 436.0 | 26177  |
| 10 | 437.0 | 7170   |

4-(5-(1,3-dioxisoindolin-2-yl)naphthalene-1-sulfonamido)-N-methylpiperidine-

# 1-carboxamide (7)

<sup>1</sup>H NMR (400 MHz, CDCl<sub>3</sub>)

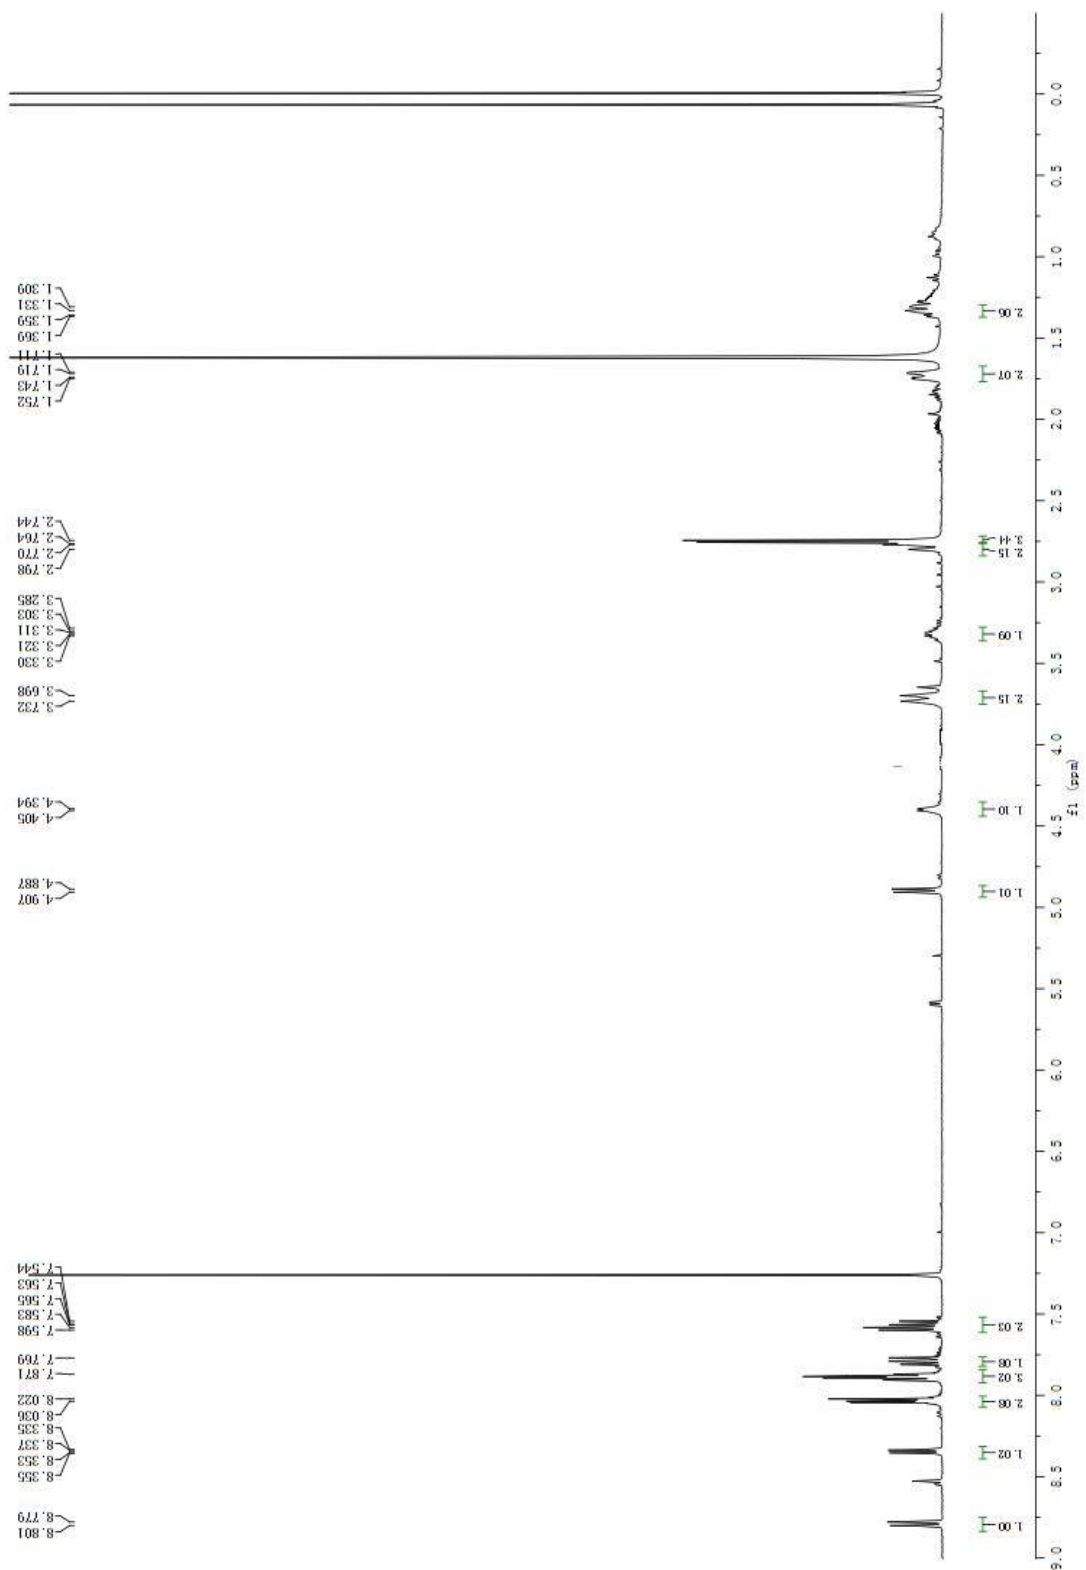

4-(5-(1,3-dioxisoindolin-2-yl)naphthalene-1-sulfonamido)-N-methylpiperidine-



# 1-carboxamide (7)

## HRMS

Page 1

### Elemental Composition Report

#### Single Mass Analysis

Tolerance = 10.0 PPM / DBE: min = -1.8, max = 50.0

Element prediction: Off

Number of isotope peaks used for i-FIT = 3

Monoisotopic Mass, Even Electron Ions

26 formula(e) evaluated with 1 results within limits (all results (up to 1000) for each mass)

Elements Used:

C: 25-28 H: 24-25 N: 0-6 O: 0-6 S: 0-1

492.1467

FX-003 3 (0.082) Cm (3.48)

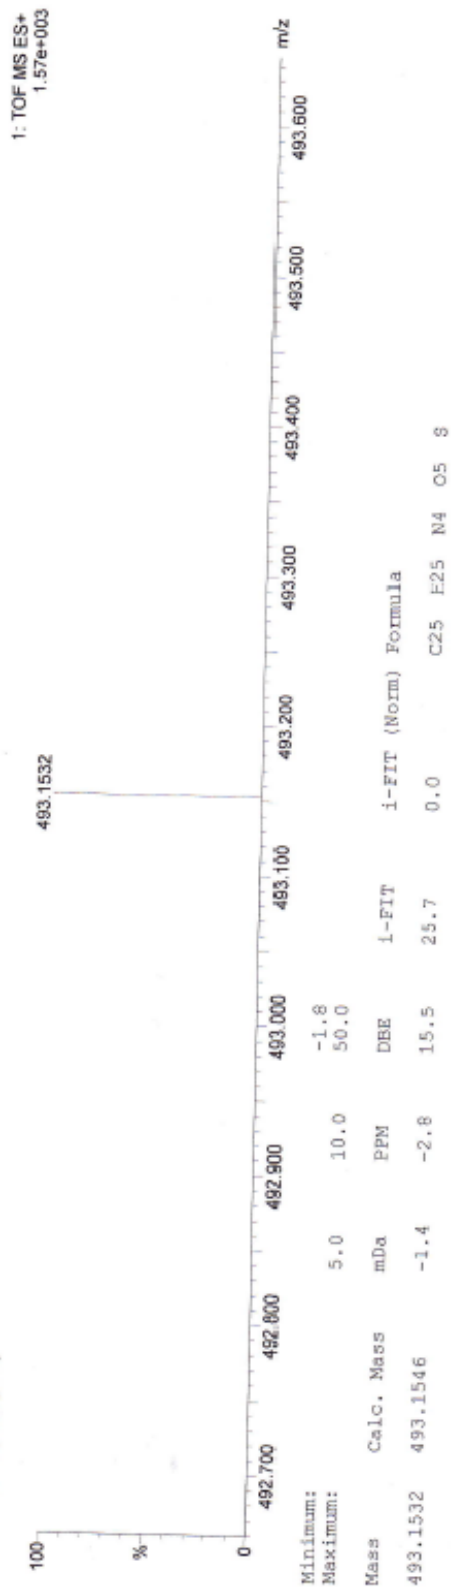

# 4-(5-aminonaphthalene-1-sulfonamido)-N-methylpiperidine-1-carboxamide (8)



**<sup>13</sup>C NMR (400 MHz, CD<sub>3</sub>OD)**

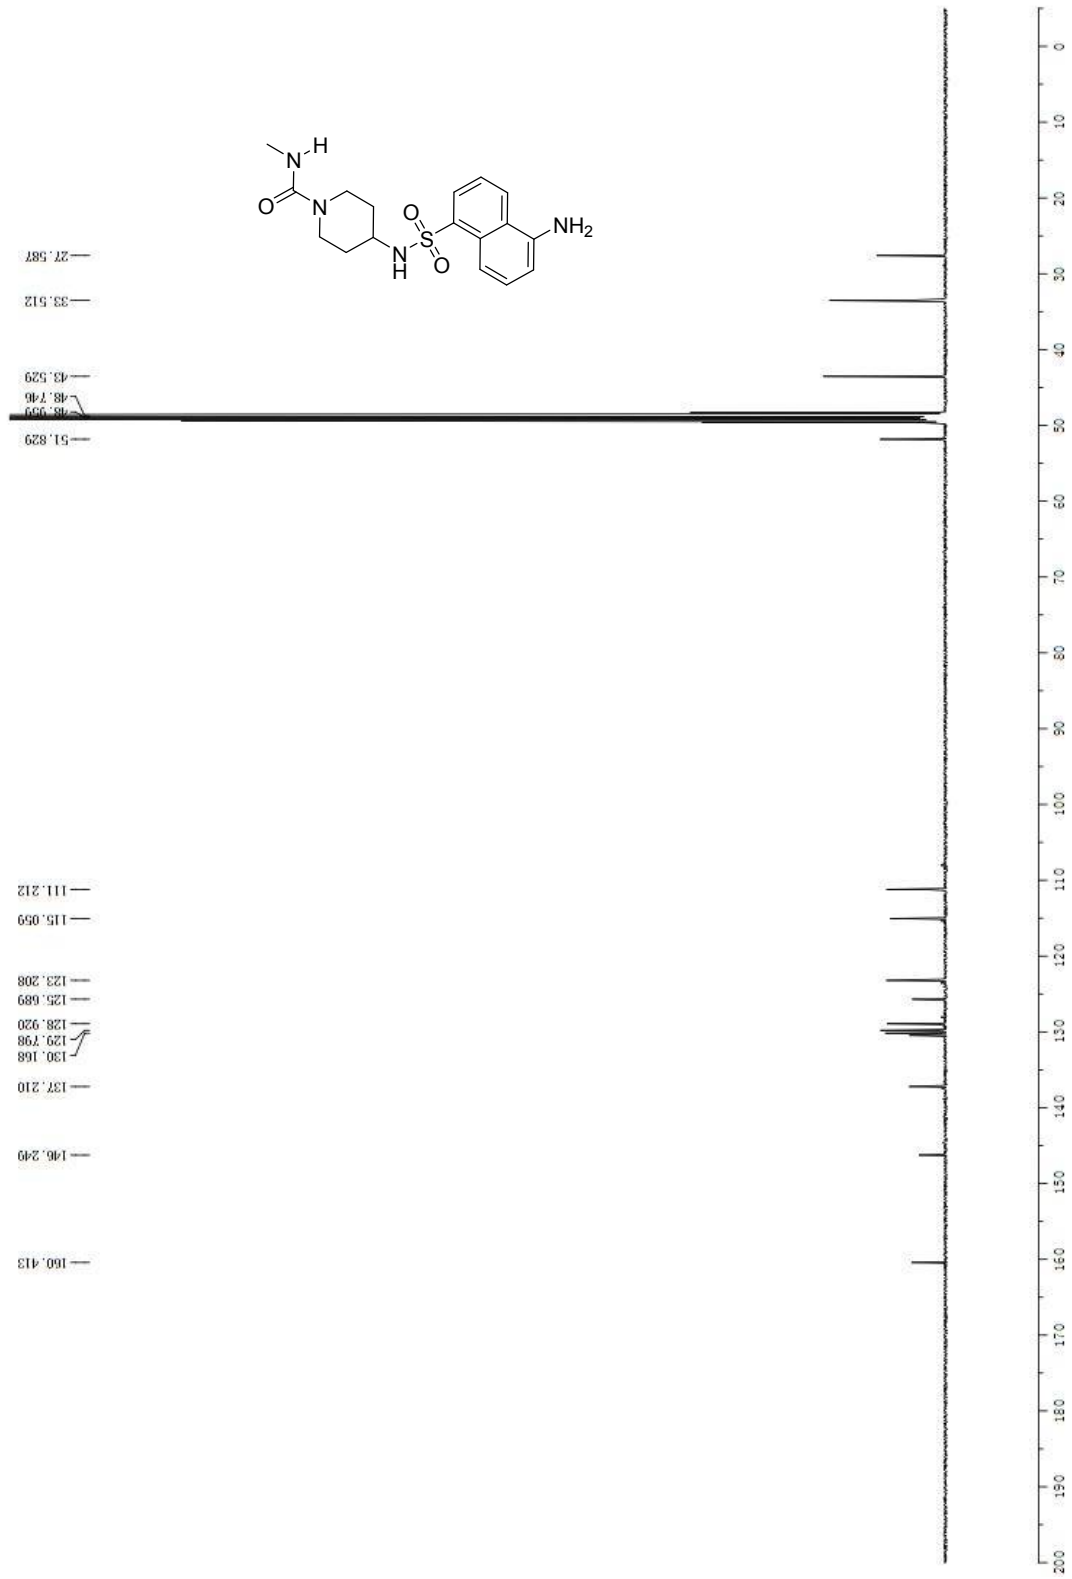

**4-(5-aminonaphthalene-1-sulfonamido)-N-methylpiperidine-1-carboxamide (8)**

Elemental Composition Report

Single Mass Analysis

Tolerance = 10.0 PPM / DBE: min = -1.8, max = 50.0

Element prediction: Off

Number of isotope peaks used for i-FIT = 3

Monoisotopic Mass, Even Electron Ions

54 formulae) evaluated with 1 results within limits (all results (up to 1000) for each mass)

Elements Used:

C: 17-17 H: 22-23 N: 0-6 O: 0-6 S: 0-1

362.1413

FX-004 3 (0.082) Cm (2:39)

1: TOF MS ES+  
1.50e+004

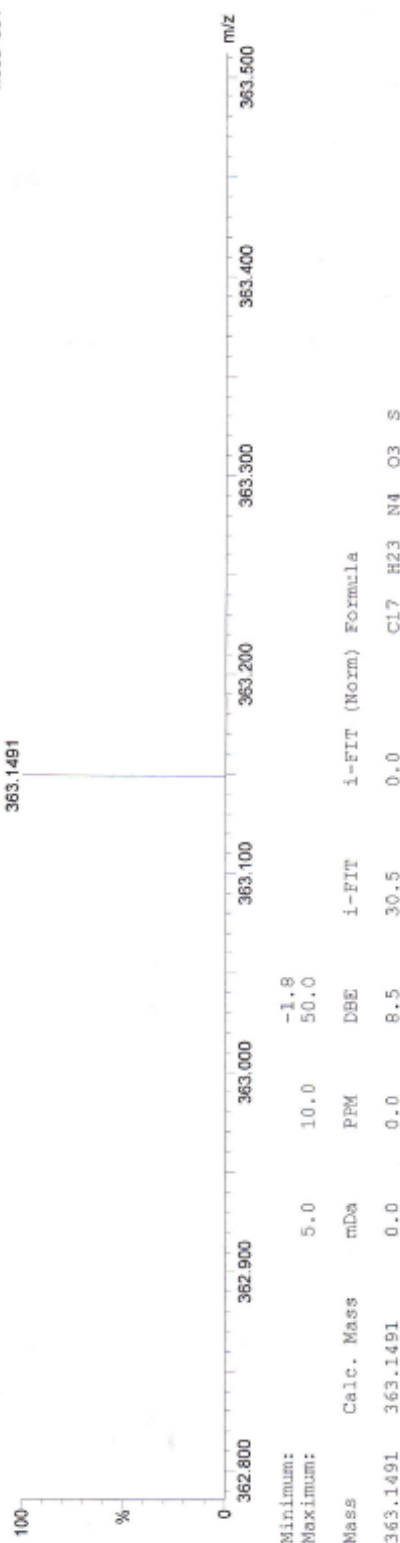

Minimum: -1.8  
Maximum: 50.0

| Mass     | Calc. Mass | mDa | PPM | DBE | i-FIT | i-FIT (Norm) | Formula         |
|----------|------------|-----|-----|-----|-------|--------------|-----------------|
| 363.1491 | 363.1491   | 0.0 | 0.0 | 8.5 | 30.5  | 0.0          | C17 H23 N4 O3 S |

N-methyl-4-(5-(pyridin-2-ylmethylamino)naphthalene-1-sulfonamido)piperidine-

# 1-carboxamide (1)

<sup>1</sup>H NMR (400 MHz, CD<sub>3</sub>OD)

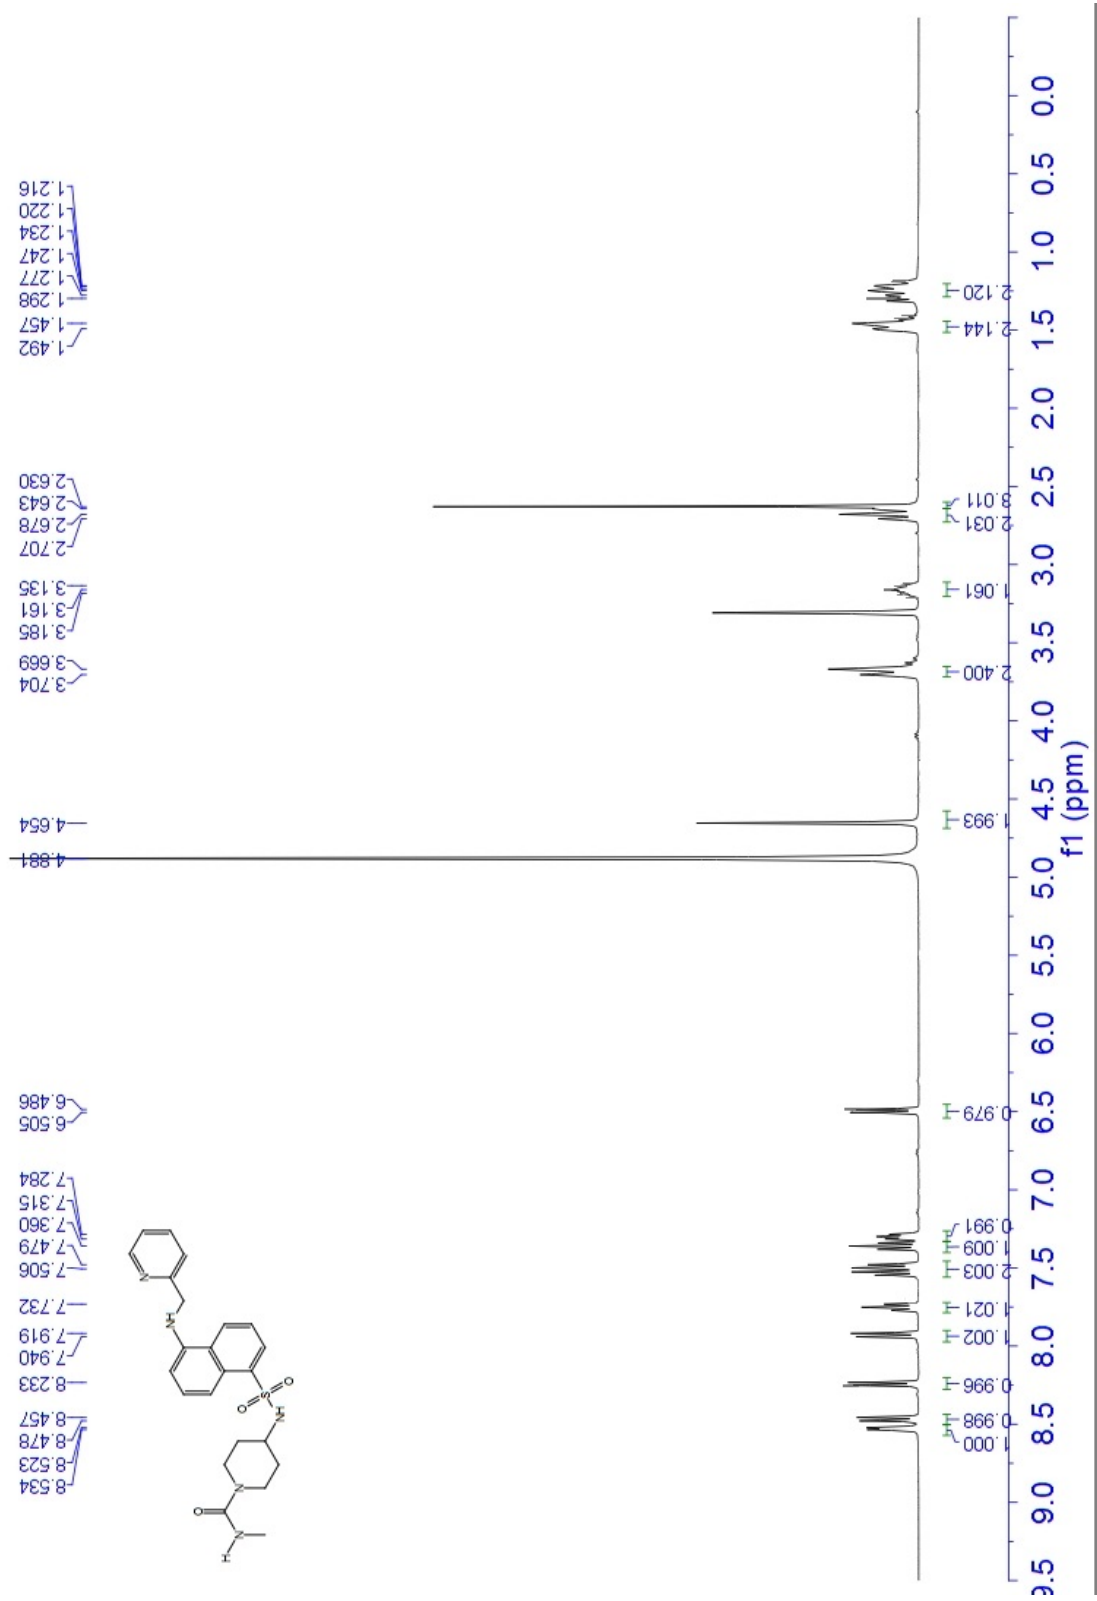

N-methyl-4-(5-(pyridin-2-ylmethylamino)naphthalene-1-sulfonamido)piperidine-

# 1-carboxamide (1)

<sup>13</sup>C NMR (400 MHz, CD<sub>3</sub>OD)

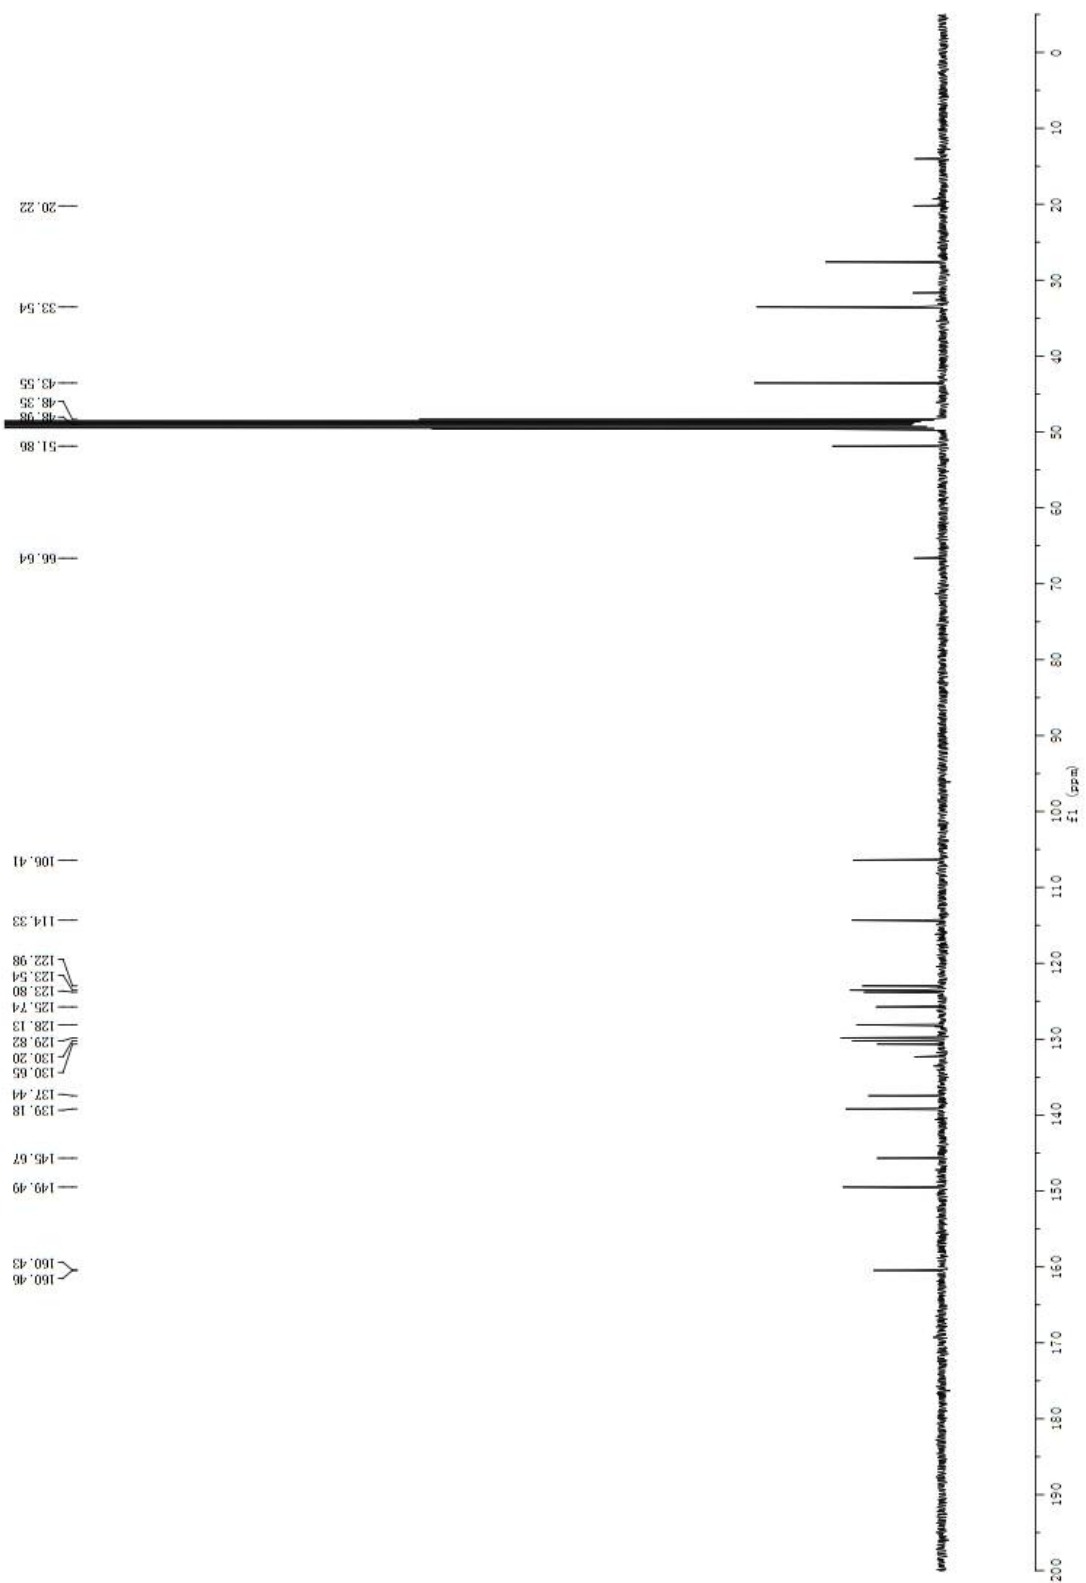

N-methyl-4-(5-(pyridin-2-ylmethylamino)naphthalene-1-sulfonamido)piperidine-

# 1-carboxamide (1)

## HRMS

Page 1

### Elemental Composition Report

#### Single Mass Analysis

Tolerance = 10.0 PPM / DBE: min = -1.8, max = 50.0

Element prediction: Off

Number of isotope peaks used for i-FIT = 3

Monoisotopic Mass, Even Electron Ions

53 formula(e) evaluated with 1 results within limits (all results (up to 1000) for each mass)

Elements Used:

C: 19-24 H: 24-30 N: 0-6 O: 0-6 S: 0-1

453.1835

FX-008 9 (0.220)

1: TOF MS ES+  
1.72e+001

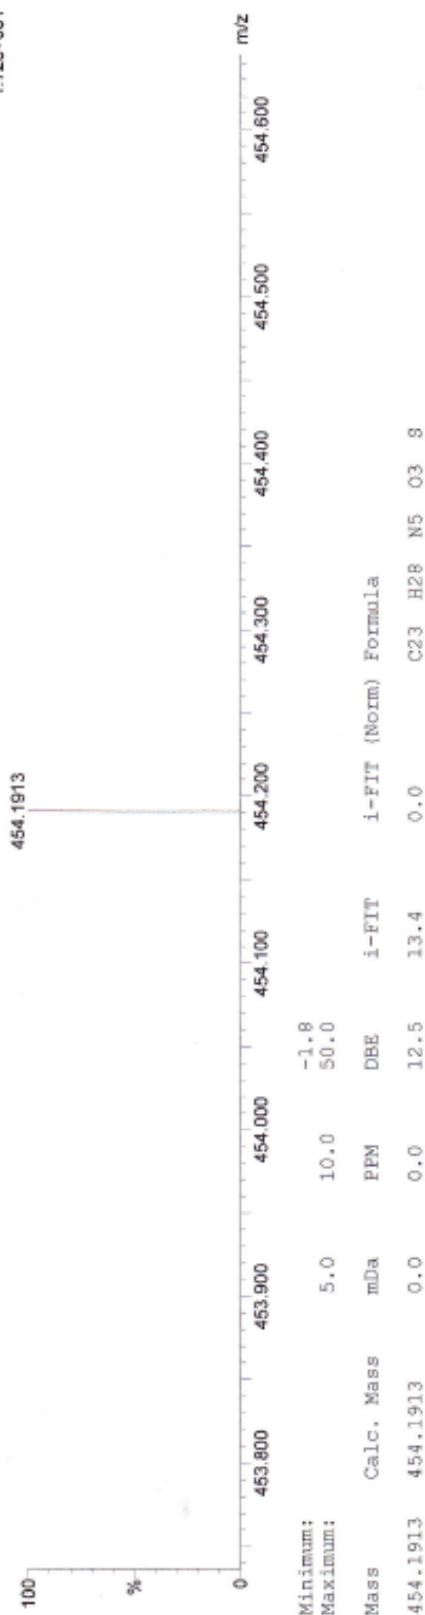

Minimum: -1.8

Maximum: 50.0

| Mass | Calc. Mass | mDa | PPM | DBE | i-FIT | i-FIT (Norm) | Formula |
|------|------------|-----|-----|-----|-------|--------------|---------|
|------|------------|-----|-----|-----|-------|--------------|---------|

|          |          |     |     |      |      |     |                 |
|----------|----------|-----|-----|------|------|-----|-----------------|
| 454.1913 | 454.1913 | 0.0 | 0.0 | 12.5 | 13.4 | 0.0 | C23 H28 N5 O3 8 |
|----------|----------|-----|-----|------|------|-----|-----------------|
